# Supplementary material for: Inhibition of PC4 radiosensitizes non‐small cell lung cancer by transcriptionally suppressing XLF
Source: PubMed Central journal article supplement (PMC5911594; doi:10.1002/cam4.1332), 2018-03-09

Figure 1

PageRuler™ Prestained Protein Ladder (ThermoFisher)  
Cat no: 26616

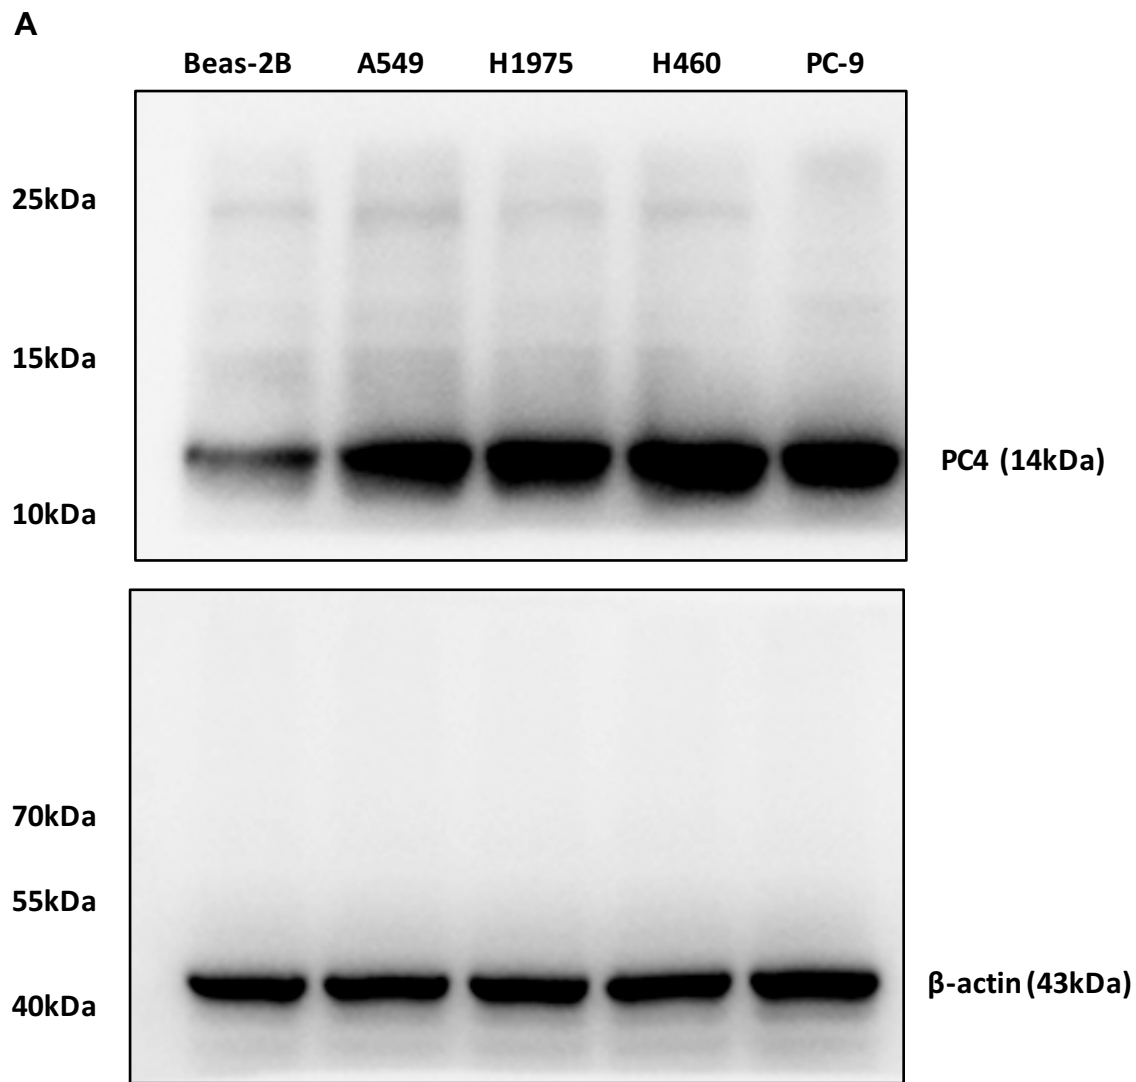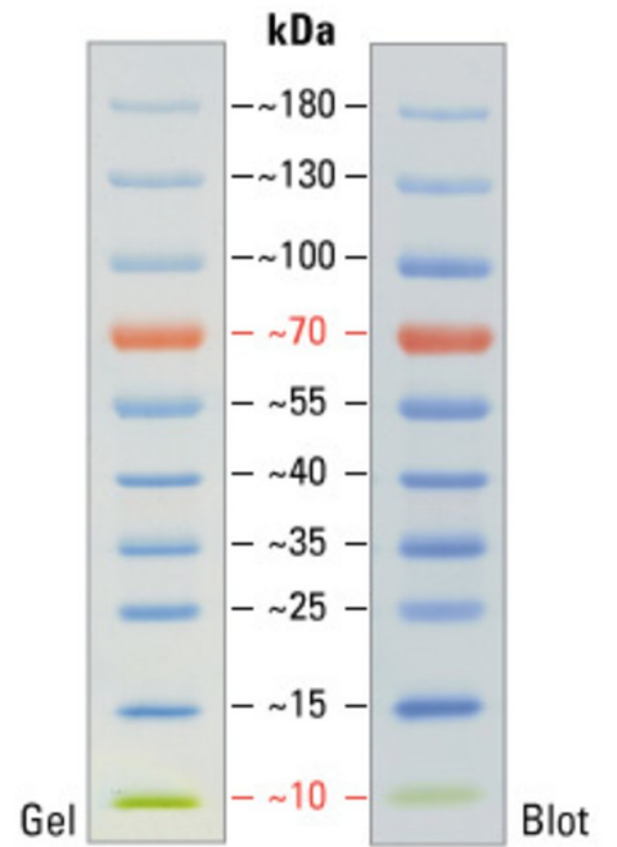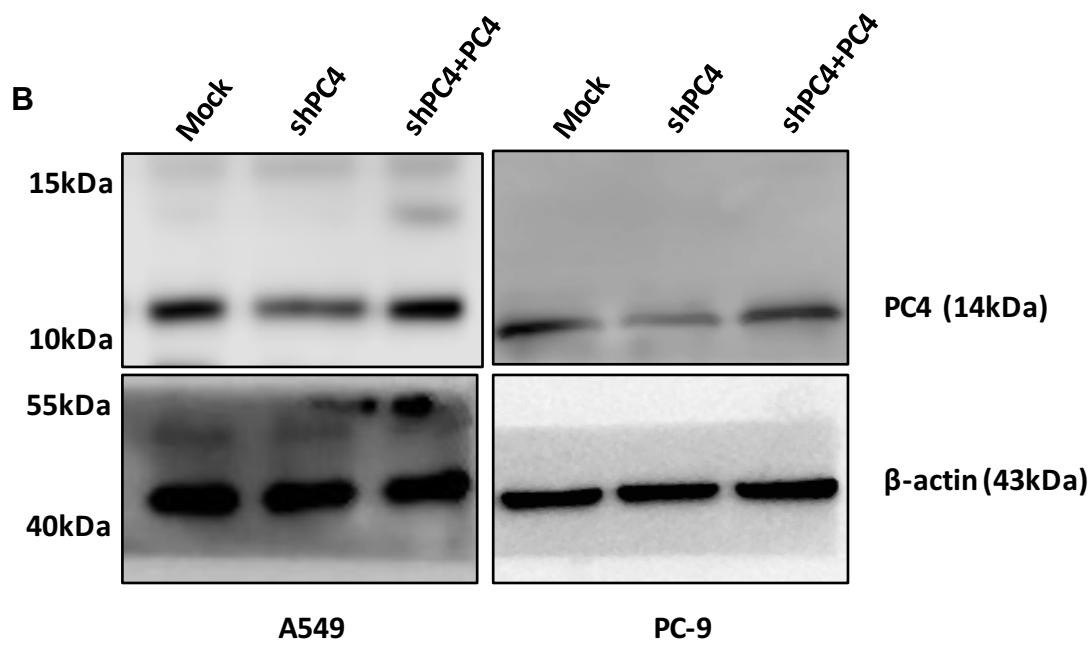

Figure 2

B

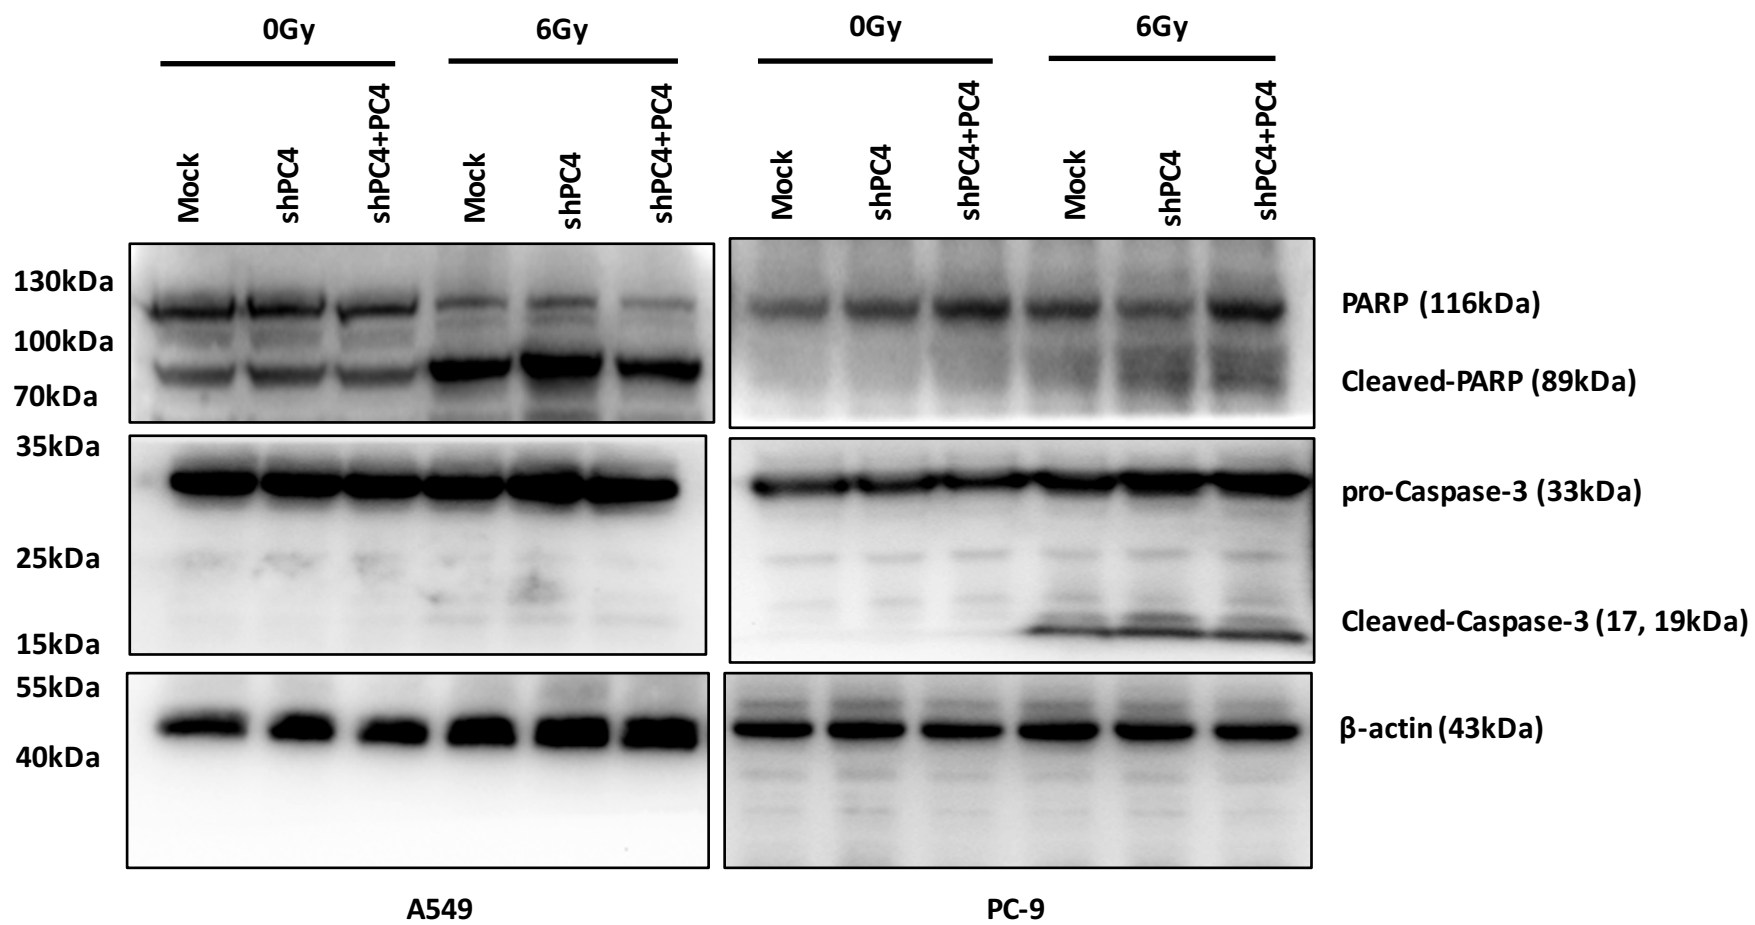

Figure 4

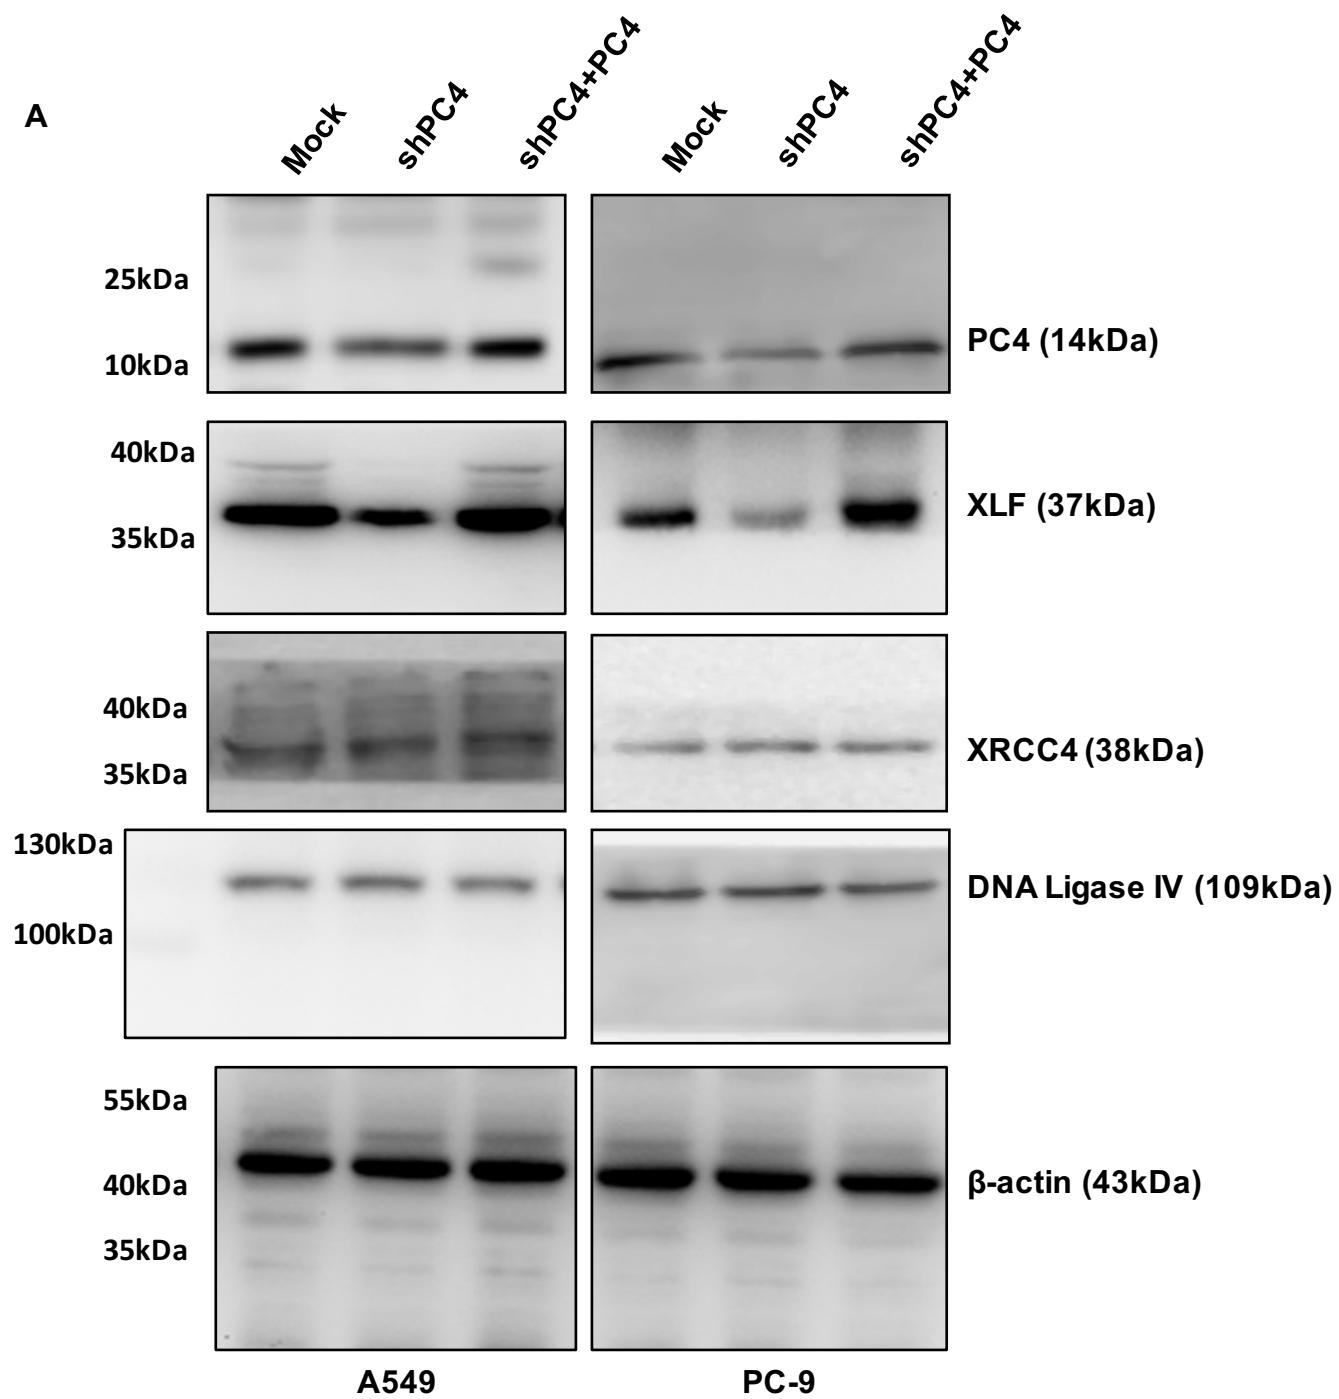

Figure 5 A

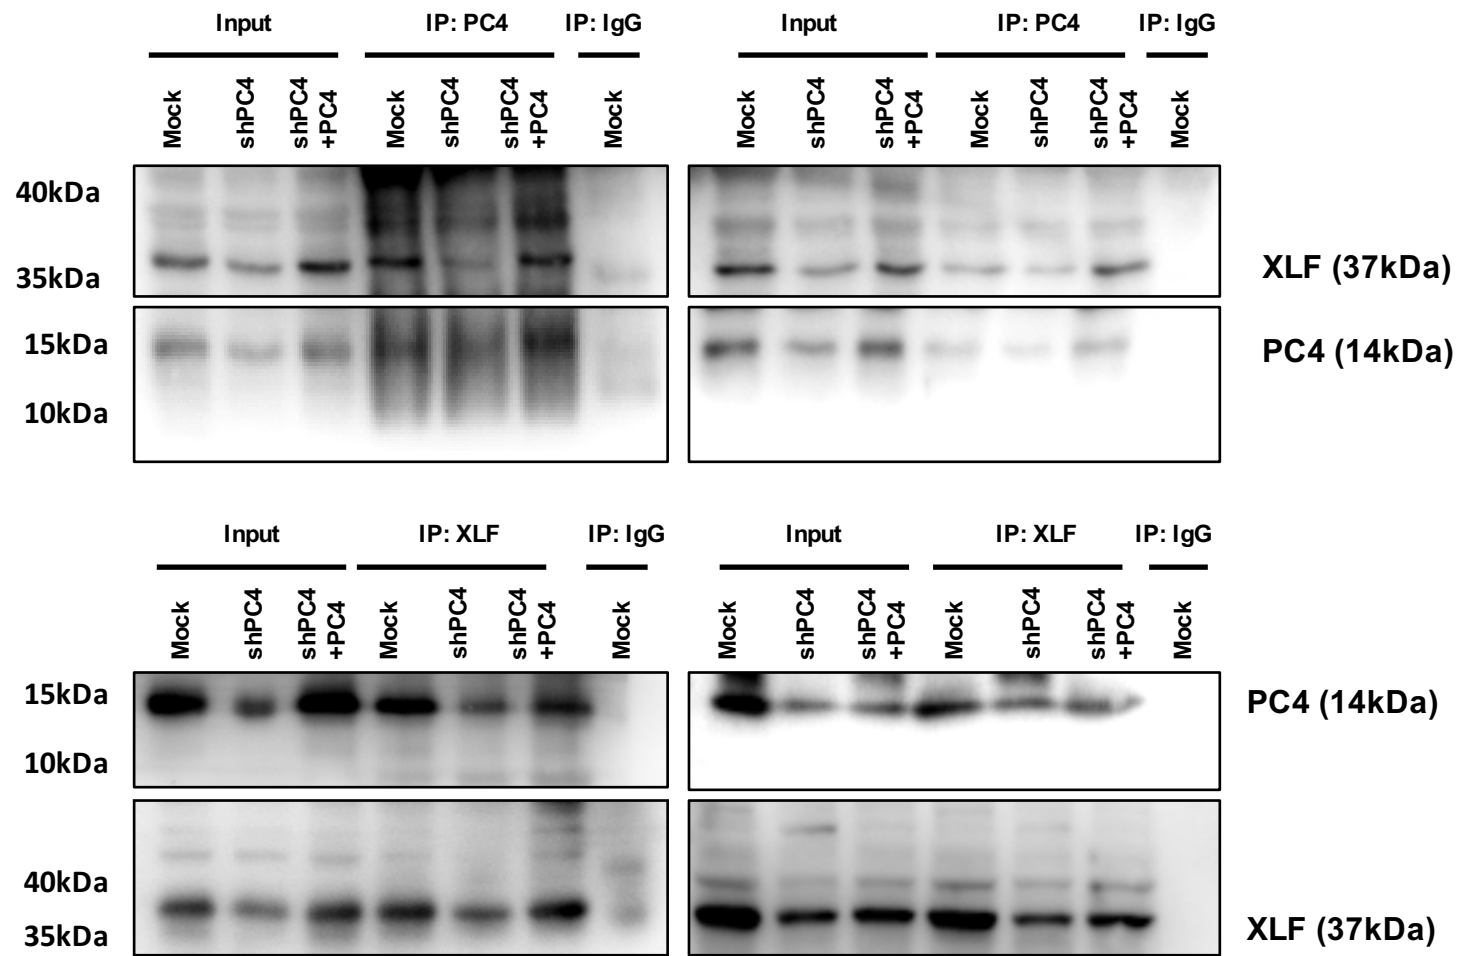

Figure 5

D

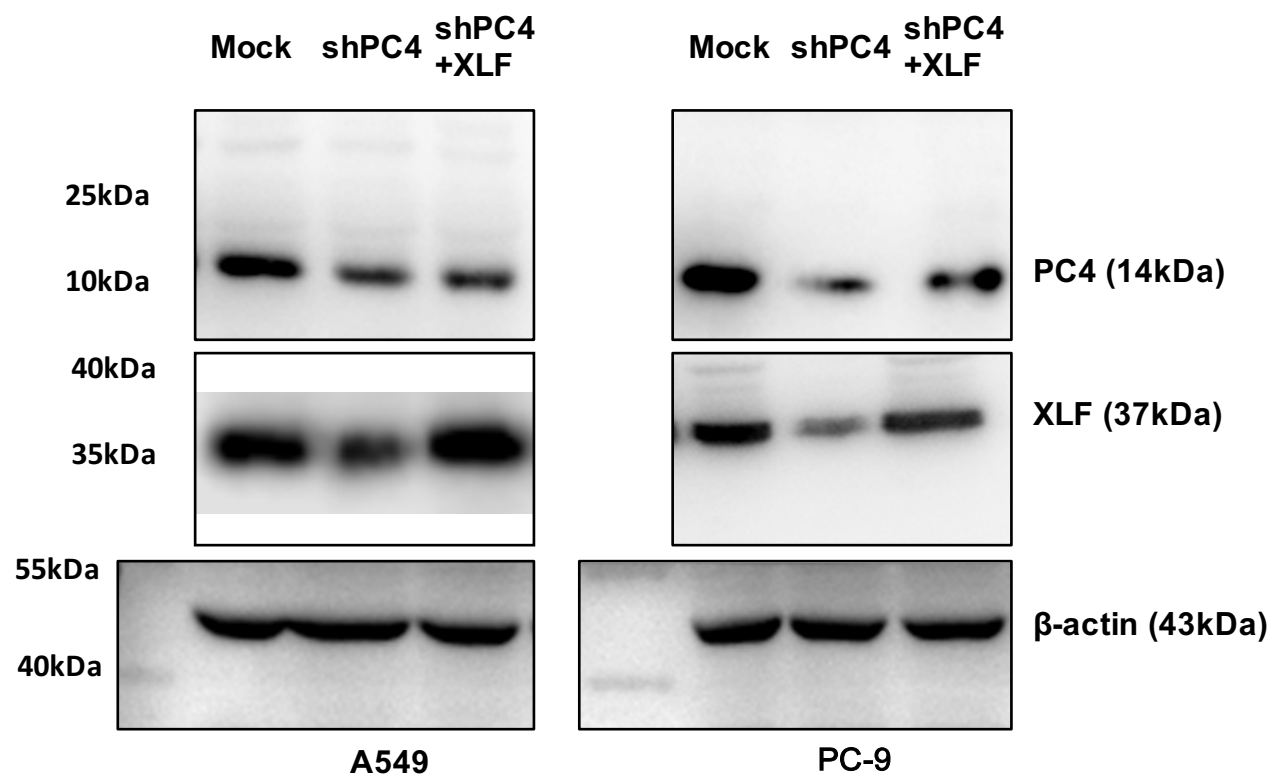

Supplement: CAM4-7-1326-s004.pdf [file CAM4-7-1326-s004.pdf]
